# Supplementary material for: Machine learning prognosis model based on patient-reported outcomes for chronic heart failure patients after discharge
Source: PubMed Central journal article supplement (PMC10053412; doi:10.1186/s12955-023-02109-x), 2023-03-29
Supplement: 12955_2023_2109_MOESM1_ESM.pdf [file 12955_2023_2109_MOESM1_ESM.pdf]

**Table S1 TRIPOD Statement—Checklist of items**

| Section/Topic             | Item | Checklist Item                                                                                                                                                                                   | Page     |
|---------------------------|------|--------------------------------------------------------------------------------------------------------------------------------------------------------------------------------------------------|----------|
| <b>Title and abstract</b> |      |                                                                                                                                                                                                  |          |
| Title                     | 1    | Identify the study as developing and/or validating a multivariable prediction model, the target population, and the outcome to be predicted.                                                     | Title    |
| Abstract                  | 2    | Provide a summary of objectives, study design, setting, participants, sample size, predictors, outcome, statistical analysis, results, and conclusions.                                          | Abstract |
| <b>Introduction</b>       |      |                                                                                                                                                                                                  |          |
| Background and objectives | 3a   | Explain the medical context (including whether diagnostic or prognostic) and rationale for developing or validating the multivariable prediction model, including references to existing models. | 1        |
|                           | 3b   | Specify the objectives, including whether the study describes the development or validation of the model or both.                                                                                | 2        |
| <b>Methods</b>            |      |                                                                                                                                                                                                  |          |
| Source of data            | 4a   | Describe the study design or source of data (e.g., randomized trial, cohort, or registry data), separately for the development and validation data sets, if applicable.                          | 2        |
|                           | 4b   | Specify the key study dates, including start of accrual; end of accrual; and, if applicable, end of follow-up.                                                                                   | 2        |
| Participants              | 5a   | Specify key elements of the study setting (e.g., primary care, secondary care, general population) including number and location of centres.                                                     | 2        |
|                           | 5b   | Describe eligibility criteria for participants.                                                                                                                                                  | 2        |

|                              |     |                                                                                                                                                                                                       |          |
|------------------------------|-----|-------------------------------------------------------------------------------------------------------------------------------------------------------------------------------------------------------|----------|
|                              | 5c  | Give details of treatments received, if relevant.                                                                                                                                                     | N/A      |
| Outcome                      | 6a  | Clearly define the outcome that is predicted by the prediction model, including how and when assessed.                                                                                                | 2, 4     |
|                              | 6b  | Report any actions to blind assessment of the outcome to be predicted.                                                                                                                                | N/A      |
| Predictors                   | 7a  | Clearly define all predictors used in developing or validating the multivariable prediction model, including how and when they were measured.                                                         | 2, 3     |
|                              | 7b  | Report any actions to blind assessment of predictors for the outcome and other predictors.                                                                                                            | N/A      |
| Sample size                  | 8   | Explain how the study size was arrived at.                                                                                                                                                            | 4, 5     |
| Missing data                 | 9   | Describe how missing data were handled (e.g., complete-case analysis, single imputation, multiple imputation) with details of any imputation method.                                                  | 4        |
| Statistical analysis methods | 10a | Describe how predictors were handled in the analyses.                                                                                                                                                 | 4        |
|                              | 10b | Specify type of model, all model-building procedures (including any predictor selection), and method for internal validation.                                                                         | 4, 5, 6  |
|                              | 10d | Specify all measures used to assess model performance and, if relevant, to compare multiple models.                                                                                                   | 6        |
| Risk groups                  | 11  | Provide details on how risk groups were created, if done.                                                                                                                                             | N/A      |
| <b>Results</b>               |     |                                                                                                                                                                                                       |          |
| Participants                 | 13a | Describe the flow of participants through the study, including the number of participants with and without the outcome and, if applicable, a summary of the follow-up time. A diagram may be helpful. | Table 1  |
|                              | 13b | Describe the characteristics of the participants (basic demographics, clinical                                                                                                                        | Table 1, |

|                           |     |                                                                                                                                                                             |               |
|---------------------------|-----|-----------------------------------------------------------------------------------------------------------------------------------------------------------------------------|---------------|
|                           |     | features, available predictors), including the number of participants with missing data for predictors and outcome.                                                         | Table S3-S5   |
| Model development         | 14a | Specify the number of participants and outcome events in each analysis.                                                                                                     | Table 1       |
|                           | 14b | If done, report the unadjusted association between each candidate predictor and outcome.                                                                                    | Table S3-S5   |
| Model specification       | 15a | Present the full prediction model to allow predictions for individuals (i.e., all regression coefficients, and model intercept or baseline survival at a given time point). | 8, 9          |
|                           | 15b | Explain how to use the prediction model.                                                                                                                                    | 9             |
| Model performance         | 16  | Report performance measures (with CIs) for the prediction model.                                                                                                            | Table 2       |
| <b>Discussion</b>         |     |                                                                                                                                                                             |               |
| Limitations               | 18  | Discuss any limitations of the study (such as nonrepresentative sample, few events per predictor, missing data).                                                            | 11            |
| Interpretation            | 19b | Give an overall interpretation of the results, considering objectives, limitations, and results from similar studies, and other relevant evidence.                          | 10, 11        |
| Implications              | 20  | Discuss the potential clinical use of the model and implications for future research.                                                                                       | 10, 11        |
| <b>Other information</b>  |     |                                                                                                                                                                             |               |
| Supplementary information | 21  | Provide information about the availability of supplementary resources, such as study protocol, Web calculator, and data sets.                                               | Supplementary |
| Funding                   | 22  | Give the source of funding and the role of the funders for the present study.                                                                                               | Title page    |

**Table S2 Structure of the CHF-PROM**

| <b>Domain</b>               | <b>Subdomain</b>    | <b>Item</b>                                     |
|-----------------------------|---------------------|-------------------------------------------------|
| <b>Physical domain</b>      | Somatic symptoms    | PHD1-,PHD2-,PHD3-,PHD4-,PHD5-,PHD6-,PHD7-,PHD8- |
|                             | Appetite symptoms   | PHD9-,PHD10-,PHD11-,PHD12-                      |
|                             | Independence        | PHD13,PHD14,PHD15,PHD16                         |
| <b>Psychological domain</b> | Anxiety             | PSD1-,PSD2-,PSD3-,PSD4-,PSD5-,PSD6-,PSD7-,PSD8- |
|                             | Depression          | PSD9-,PSD10-,PSD11-,PSD12-,PSD13-,PSD14-        |
|                             | Fear                | PSD15-,PSD16-,PSD17-                            |
|                             | Paranoia            | PSD18-,PSD19-,PSD20-,PSD21-                     |
| <b>Social domain</b>        | Social support      | SOC1,SOC2,SOC3,SOC4,SOC5                        |
|                             | Support utilization | SOC6,SOC7,SOC8                                  |
| <b>Therapeutic domain</b>   | Compliance          | TRE1,TRE2                                       |
|                             | Satisfaction        | TRE3,TRE4,TRE5,TRE6,TRE7,TRE8,TRE9,TRE10        |
|                             | Side effects        | TRE11,TRE12-                                    |

CHF-PRO, chronic heart failure - patient reported outcome; PHY, physical domain; PSY, psychological domain; SOC, social domain; TRE; therapeutic domain.

**Table S3 optimized hyperparameters of Machine Learning Methods**

| Parameter                                | Meaning                                                                                 | Distribution and search range | Final model configuration |            |       |
|------------------------------------------|-----------------------------------------------------------------------------------------|-------------------------------|---------------------------|------------|-------|
|                                          |                                                                                         |                               | Death                     | Readission | MACEs |
| <b>RF (RandomForestClassifier)</b>       |                                                                                         |                               |                           |            |       |
| n_estimators                             | The number of trees in the forest                                                       | [100, 1000]                   | 200                       | 700        | 500   |
| max_depth                                | Maximum tree depth for base learners                                                    | [3, 25]                       | 17                        | 13         | 15    |
| min_samples_split                        | The minimum number of samples required to split an internal node                        | [2, 25)                       | 6                         | 2          | 2     |
| min_samples_leaf                         | The minimum number of samples required to be at a leaf node                             | [1, 25)                       | 10                        | 10         | 10    |
| min_weight_fraction_leaf                 | The minimum weighted fraction of the sum total of weights required to be at a leaf node | (0.1, 0.5)                    | 0.4                       | 0.15       | 0.3   |
| max_features                             | The number of features to consider when looking for the best split                      | auto、sqrt、log2、None           | 14                        | 8          | 12    |
| <b>XGBoost (XGBClassifier package)</b>   |                                                                                         |                               |                           |            |       |
| learning_rate                            | Boosting learning rate                                                                  | [0.01, 1]                     | 0.2                       | 0.01       | 0.07  |
| max_depth                                | Maximum tree depth for base learners                                                    | [3, 25]                       | 15                        | 10         | 5     |
| min_child_weight                         | Minimum sum of instance weight(hessian) needed in a child                               | (0,+∞)                        | 0.6                       | 1          | 0.5   |
| n_estimators                             | Number of trees to fit                                                                  | [100, 1000]                   | 100                       | 100        | 400   |
| gamma                                    | Minimum loss reduction required to make a further partition on a leaf node of the tree  | (0,+)                         | 1                         | 2          | 5     |
| alpha                                    | L1 regularization term on weights                                                       | (0,+)                         | 0.4                       | 0.1        | 0.7   |
| lambda                                   | L2 regularization term on weights                                                       | (0,+)                         | 1                         | 1          | 1     |
| subsample                                | Subsample ratio of the training instance                                                | [0.5, 1.0]                    | 0.5                       | 0.4        | 0.7   |
| colsample_bytree                         | Subsample ratio of columns when constructing each tree                                  | [0.5, 1.0]                    | 0.6                       | 0.75       | 0.86  |
| <b>LightGBM (LGBMClassifier package)</b> |                                                                                         |                               |                           |            |       |

|                                              |                                                                           |                                        |        |        |        |
|----------------------------------------------|---------------------------------------------------------------------------|----------------------------------------|--------|--------|--------|
| learning_rate                                | Boosting learning rate                                                    | [0.01, 1]                              | 0.1    | 0.01   | 0.01   |
| max_depth                                    | Maximum tree depth for base learners                                      | [3, 25]                                | 12     | 15     | 13     |
| min_child_weight                             | Minimum sum of instance weight(hessian) needed in a child                 | (0,+)                                  | 14     | 1      | 20     |
| n_estimators                                 | The number of trees in the forest                                         | [100, 1000]                            | 800    | 100    | 700    |
| reg_lambda                                   | L2 regularization term on weights                                         | (0,+)                                  | 1      | 0.3    | 0.5    |
| reg_alpha                                    | L1 regularization term on weights                                         | (0,+)                                  | 200    | 100    | 100    |
| colsample_bytree                             | Subsample ratio of columns when constructing each tree                    | [0.5, 1.0]                             | 0.6    | 0.5    | 0.3    |
| subsample                                    | Subsample ratio of the training instance                                  | [0.5, 1.0]                             | 0.6    | 0.7    | 0.5    |
| <b>Logistic (LogisticRegression package)</b> |                                                                           |                                        |        |        |        |
| penalty                                      | Used to specify the norm used in the penalization                         | 'l1', 'l2', 'elasticnet' or 'none'     | 11     | 11     | 11     |
| C                                            | Inverse of regularization strength                                        | (0, 1]                                 | 0.05   | 0.02   | 0.08   |
| max_iter                                     | Maximum number of iterations taken for the solvers to converge            | [100, 1000]                            | 100    | 100    | 100    |
| <b>NB (BernoulliNB package)</b>              |                                                                           |                                        |        |        |        |
| alpha                                        | Additive (Laplace/Lidstone) smoothing parameter (0 for no smoothing)      | (0,+)                                  | 0.0001 | 0.0001 | 0.0001 |
| binarize                                     | Threshold for binarizing (mapping to booleans) of sample features         | (1, 200)                               | 40     | 60     | 60     |
| <b>MLP (MLPClassifier package)</b>           |                                                                           |                                        |        |        |        |
| hidden_layer_sizes                           | The ith element represents the number of neurons in the ith hidden layer. | (1, 300)                               | 3      | 35     | 25     |
| activation                                   | Activation function for the hidden layer                                  | 'identity', 'logistic', 'tanh', 'relu' | 'relu' | 'relu' | 'relu' |
| solver                                       | The solver for weight optimization                                        | 'lbfgs', 'sgd', 'adam'                 | 'adam' | 'adam' | 'adam' |
| alpha                                        | L2 penalty                                                                | [0.0001, 1)                            | 0.01   | 0.13   | 0.03   |

---

|                    |                                                                     |            |      |      |      |
|--------------------|---------------------------------------------------------------------|------------|------|------|------|
|                    | (regularization term)<br>parameter                                  |            |      |      |      |
| learning_rate_init | It controls the step-size in updating the weights                   | [0.01, 1]  | 0.03 | 0.02 | 0.01 |
| max_iter           | Maximum number of iterations                                        | [100,1000] | 600  | 100  | 100  |
| beta_1             | Exponential decay rate for estimates of first moment vector in adam | [0.001, 1) | 0.42 | 0.65 | 0.61 |
| beta_2             | Value for numerical stability in adam                               | [0.001, 1) | 0.07 | 0.05 | 0.44 |

---

**Table S4 Baseline Characteristics of Patients With CHF Included in the Study**

|                                           | <b>Training set</b> | <b>Testing set</b>   | <b>P</b>     |
|-------------------------------------------|---------------------|----------------------|--------------|
| <b>Death</b>                              | 44 (6.50%)          | 21 (7.95%)           | 0.429        |
| <b>HF Readmission</b>                     | 198 (29.25%)        | 70 (26.52%)          | 0.404        |
| <b>MACEs</b>                              | 237 (35.01%)        | 89 (33.71%)          | 0.708        |
| <b>Age</b>                                | 68.87 (58.7, 78.18) | 67.67 (58.29, 77.25) | 0.516        |
| <b>Female</b>                             | 293 (43.28%)        | 106 (40.15%)         | 0.383        |
| <b>NYHA</b>                               |                     |                      | $\leq 0.001$ |
| II                                        | 184 (27.18%)        | 2 (0.76%)            |              |
| III                                       | 284 (41.95%)        | 102 (38.64%)         |              |
| IV                                        | 209 (30.87%)        | 160 (60.61%)         |              |
| <b>Heart rate (beats per minute)</b>      | 76 (68, 88)         | 78 (65, 90)          | 0.999        |
| <b>Systolic blood pressure (mmHg)</b>     | 125 (114, 139)      | 120 (108, 138)       | 0.002        |
| <b>Diastolic blood pressure (mmHg)</b>    | 76 (68, 84)         | 72 (66, 82)          | 0.094        |
| <b>Body Mass Index (kg/m<sup>2</sup>)</b> | 23.5 (21.30, 26.22) | 23.44 (20.31, 27.14) | 0.798        |
| <b>Marital status</b>                     |                     |                      | 0.529        |
| Married                                   | 12 (1.77%)          | 5 (1.89%)            |              |
| Single                                    | 558 (82.42%)        | 213 (80.68%)         |              |
| Divorced                                  | 7 (1.03%)           | 6 (2.27%)            |              |
| Widowed                                   | 100 (14.77%)        | 40 (15.15%)          |              |
| <b>Education</b>                          |                     |                      | 0.036        |
| Illiteracy                                | 59 (8.71%)          | 22 (8.33%)           |              |



---

|                                 |              |              |        |
|---------------------------------|--------------|--------------|--------|
| Low level                       | 387 (57.16%) | 174 (65.91%) |        |
| Secondary school and high level | 231 (34.12%) | 68 (25.76%)  |        |
| <b>Occupation</b>               |              |              | 0.073  |
| Manual workers                  | 438 (64.70%) | 187 (70.83%) |        |
| Nonmanual workers               | 239 (35.30%) | 77 (29.17%)  |        |
| <b>Income</b>                   |              |              | 0.061  |
| Low                             | 363 (53.62%) | 162 (61.36%) |        |
| Medium                          | 301 (44.46%) | 100 (37.88%) |        |
| High                            | 13 (1.92%)   | 2 (0.76%)    |        |
| <b>Health care</b>              |              |              | 0.585  |
| City health insurance           | 432 (63.81%) | 168 (63.64%) |        |
| Rural health insurance          | 218 (32.20%) | 89 (33.71%)  |        |
| Self-paying                     | 27 (3.99%)   | 7 (2.65%)    |        |
| <b>Family history</b>           | 181 (26.74%) | 60 (22.73%)  | 0.206  |
| <b>Smoking history</b>          |              |              | 0.106  |
| Never                           | 428 (63.22%) | 149 (56.44%) |        |
| Quitting smoking                | 164 (24.22%) | 81 (30.68%)  |        |
| Smoking                         | 85 (12.56%)  | 34 (12.88%)  |        |
| <b>Drinking</b>                 | 47 (6.94%)   | 15 (5.68%)   | ≤0.001 |
| <b>Complications</b>            |              |              |        |
| Diabetes                        | 197 (29.10%) | 65 (24.62%)  | 0.169  |

---

|                             |              |              |        |
|-----------------------------|--------------|--------------|--------|
| Atrial fibrillation         | 233 (34.42%) | 120 (45.45%) | 0.002  |
| Stroke                      | 98 (14.48%)  | 69 (26.14%)  | ≤0.001 |
| COPD                        | 94 (13.88%)  | 20 (7.58%)   | 0.008  |
| Cancers                     | 30 (4.43%)   | 1 (0.38%)    | 0.002  |
| Coronary heart disease      | 363 (53.62%) | 124 (46.97%) | 0.067  |
| Hypertension                | 396 (58.49%) | 121 (45.83%) | ≤0.001 |
| Chronic renal insufficiency | 135 (19.94%) | 49 (18.56%)  | 0.631  |
| Valvular heart disease      | 127 (18.76%) | 71 (26.89%)  | 0.006  |
| <b>CHF-PRO</b>              |              |              |        |
| Physical domain             | 41 (33, 49)  | 40 (32, 49)  | 0.191  |
| Psychological domain        | 69 (56, 77)  | 70 (58, 78)  | 0.404  |
| Social domain               | 18 (13, 22)  | 17 (13, 21)  | 0.135  |
| Therapeutic domain          | 34 (31, 39)  | 34 (31, 38)  | 0.432  |

CHF-PRO, chronic heart failure - patient reported outcome; COPD, chronic obstructive pulmonary disease; NYHA, New York Heart Association functional class; MACEs, major adverse cardiovascular events.

**Table S5 Baseline Characteristics of Death and Survival Patients**

|                                           | <b>Survival (n=876)</b> | <b>Death (n=65)</b>  | <b>P</b> |
|-------------------------------------------|-------------------------|----------------------|----------|
| <b>Age</b>                                | 67.83 (58.24, 77.66)    | 73.84 (64.83, 80.34) | 0.009    |
| <b>Female</b>                             | 507 (57.88%)            | 35 (53.85%)          | 0.526    |
| <b>NYHA</b>                               |                         |                      | <0.001   |
| II                                        | 176 (20.09%)            | 10 (15.38%)          |          |
| III                                       | 372 (42.47%)            | 14 (21.54%)          |          |
| IV                                        | 328 (37.44%)            | 41 (63.08%)          |          |
| <b>Heart rate (beats per minute)</b>      | 76 (67, 89)             | 77 (68, 92)          | 0.318    |
| <b>Systolic blood pressure (mmHg)</b>     | 125 (112, 139)          | 118 (106, 132)       | 0.005    |
| <b>Diastolic blood pressure (mmHg)</b>    | 76 (68, 84)             | 72 (62, 81)          | 0.092    |
| <b>Body Mass Index (kg/m<sup>2</sup>)</b> | 23.66 (21.22, 26.67)    | 21.85 (19.68, 24.68) | 0.002    |
| <b>Marital state</b>                      |                         |                      | 0.258    |
| Married                                   | 15 (1.71%)              | 2 (3.08%)            |          |
| Single                                    | 722 (82.42%)            | 49 (75.38%)          |          |
| Divorced                                  | 13 (1.48%)              | 0                    |          |
| Widowed                                   | 126 (14.38%)            | 14 (21.54%)          |          |
| <b>Education</b>                          |                         |                      | 0.963    |
| Illiteracy                                | 76 (8.68%)              | 5 (7.69%)            |          |
| Low level                                 | 522 (59.59%)            | 39 (60.00%)          |          |
| Secondary school and high level           | 278 (31.74%)            | 21 (32.31%)          |          |
| <b>Occupation</b>                         |                         |                      | 0.297    |

---

|                             |              |             |       |
|-----------------------------|--------------|-------------|-------|
| Manual workers              | 578 (65.98%) | 47 (72.31%) |       |
| Nonmanual workers           | 298 (34.02%) | 18 (27.69%) |       |
| <b>Income</b>               |              |             | 0.997 |
| Low                         | 489 (55.82%) | 36 (55.38%) |       |
| Medium                      | 373 (42.58%) | 28 (43.08%) |       |
| High                        | 14 (1.60%)   | 1 (1.54%)   |       |
| <b>Health care</b>          |              |             | 0.955 |
| City health insurance       | 559 (63.81%) | 41 (63.08%) |       |
| Rural health insurance      | 285 (32.53%) | 22 (33.85%) |       |
| Self-paying                 | 32 (3.65%)   | 2 (3.08%)   |       |
| <b>Family history</b>       | 231 (26.37%) | 10 (15.38%) | 0.050 |
| <b>Smoking history</b>      |              |             | 0.531 |
| Never                       | 538 (61.42%) | 39 (60.00%) |       |
| Quitting smoking            | 230 (26.26%) | 15 (23.08%) |       |
| Smoking                     | 108 (12.33%) | 11 (16.92%) |       |
| <b>Drinking</b>             | 59 (6.74%)   | 3 (4.62%)   | 0.129 |
| <b>Complications</b>        |              |             |       |
| Coronary heart disease      | 450 (51.37%) | 37 (56.92%) | 0.387 |
| Hypertension                | 488 (55.71%) | 29 (44.62%) | 0.083 |
| Chronic renal insufficiency | 164 (18.72%) | 20 (30.77%) | 0.018 |
| Diabetes                    | 244 (27.85%) | 18 (27.69%) | 0.978 |
| Atrial fibrillation         | 324 (36.99%) | 29 (44.62%) | 0.220 |

---

|                        |              |             |        |
|------------------------|--------------|-------------|--------|
| Stroke                 | 157 (17.92%) | 10 (15.38%) | 0.605  |
| COPD                   | 106 (12.10%) | 8 (12.31%)  | 0.961  |
| Cancers                | 26 (2.97%)   | 5 (7.69%)   | 0.040  |
| Valvular heart disease | 181 (20.66%) | 17 (26.15%) | 0.295  |
| <b>CHF-PRO</b>         |              |             |        |
| Physical domain        | 42 (33, 50)  | 35 (28, 40) | <0.001 |
| Psychological domain   | 69 (56, 77)  | 67 (58, 78) | 0.911  |
| Social domain          | 17 (13, 21)  | 18 (14, 22) | 0.270  |
| Therapeutic domain     | 34 (31, 39)  | 34 (31, 41) | 0.958  |

CHF-PRO, chronic heart failure - patient reported outcome; COPD, chronic obstructive pulmonary disease; NYHA, New York Heart Association functional class.

**Table S6 Baseline Characteristics of Patients With or Without Rehospitalization**

|                                           | <b>Without<br/>Rehospitalization<br/>(n=673)</b> | <b>Rehospitalization<br/>(n=268)</b> | <b><i>P</i></b> |
|-------------------------------------------|--------------------------------------------------|--------------------------------------|-----------------|
| <b>Age</b>                                | 67.59 (56.64, 77.84)                             | 70.09 (62.05, 78.05)                 | 0.040           |
| <b>Female</b>                             | 267 (39.67%)                                     | 132 (49.25%)                         | 0.007           |
| <b>NYHA</b>                               |                                                  |                                      | 0.579           |
| II                                        | 136 (20.21%)                                     | 50 (18.66%)                          |                 |
| III                                       | 269 (39.97%)                                     | 117 (43.66%)                         |                 |
| IV                                        | 268 (39.82%)                                     | 101 (37.69%)                         |                 |
| <b>Heart rate (beats per minute)</b>      | 77 (67, 90)                                      | 75 (66, 87)                          | 0.185           |
| <b>Systolic blood pressure (mmHg)</b>     | 124 (111, 138)                                   | 125 (110, 139)                       | 0.919           |
| <b>Diastolic blood pressure (mmHg)</b>    | 75 (67, 83)                                      | 76 (67, 83)                          | 0.811           |
| <b>Body Mass Index (kg/m<sup>2</sup>)</b> | 23.44 (20.90, 26.56)                             | 23.73 (21.45, 26.57)                 | 0.420           |
| <b>Marital status</b>                     |                                                  |                                      | 0.829           |
| Married                                   | 12 (1.78%)                                       | 5 (1.87%)                            |                 |
| Single                                    | 555 (82.47%)                                     | 216 (80.60%)                         |                 |
| Divorced                                  | 8 (1.19%)                                        | 5 (1.87%)                            |                 |
| Widowed                                   | 98 (14.56%)                                      | 42 (15.67%)                          |                 |
| <b>Education</b>                          |                                                  |                                      | 0.559           |
| Illiteracy                                | 55 (8.17%)                                       | 26 (9.70%)                           |                 |
| Low level                                 | 408 (60.62%)                                     | 153 (57.09%)                         |                 |

---

|                                 |              |              |       |
|---------------------------------|--------------|--------------|-------|
| Secondary school and high level | 210 (31.20%) | 89 (33.21%)  |       |
| <b>Occupation</b>               |              |              | 0.540 |
| Manual workers                  | 451 (67.01%) | 174 (64.93%) |       |
| Nonmanual workers               | 222 (32.99%) | 94 (35.07%)  |       |
| <b>Income</b>                   |              |              | 0.329 |
| Low                             | 384 (57.06%) | 141 (52.61%) |       |
| Medium                          | 280 (41.60%) | 121 (45.15%) |       |
| High                            | 9 (1.34%)    | 6 (2.24%)    |       |
| <b>Health care</b>              |              |              | 0.273 |
| City health insurance           | 419 (62.26%) | 181 (67.54%) |       |
| Rural health insurance          | 230 (34.18%) | 77 (28.73%)  |       |
| Self-paying                     | 24 (3.57%)   | 10 (3.73%)   |       |
| <b>Family history</b>           | 170 (25.26%) | 71 (26.49%)  | 0.696 |
| <b>Smoking history</b>          |              |              | 0.004 |
| Never                           | 391 (58.10%) | 186 (69.40%) |       |
| Quitting smoking                | 187 (27.79%) | 58 (21.64%)  |       |
| Smoking                         | 95 (14.12%)  | 24 (8.96%)   |       |
| <b>Drinking</b>                 | 47 (6.98%)   | 15 (5.60%)   | 0.007 |
| <b>Complications</b>            |              |              |       |
| Coronary heart disease          | 350 (52.01%) | 137 (51.12%) | 0.806 |
| Hypertension                    | 368 (54.68%) | 149 (55.60%) | 0.799 |
| Chronic renal insufficiency     | 124 (18.42%) | 60 (22.39%)  | 0.167 |

---

|                        |              |              |        |
|------------------------|--------------|--------------|--------|
| Diabetes               | 183 (27.19%) | 79 (29.48%)  | 0.480  |
| Atrial fibrillation    | 237 (35.22%) | 116 (43.28%) | 0.021  |
| Stroke                 | 112 (16.64%) | 55 (20.52%)  | 0.160  |
| COPD                   | 84 (12.48%)  | 30 (11.19%)  | 0.585  |
| Cancers                | 21 (3.12%)   | 10 (3.73%)   | 0.636  |
| Valvular heart disease | 133 (19.76%) | 65 (24.25%)  | 0.127  |
| <b>CHF-PRO</b>         |              |              |        |
| Physical domain        | 42 (33, 50)  | 39 (31, 46)  | <0.001 |
| Psychological domain   | 71 (58, 78)  | 65 (52, 74)  | <0.001 |
| Social domain          | 17 (13, 21)  | 17 (13, 21)  | 0.283  |
| Therapeutic domain     | 34 (31, 39)  | 34 (31, 39)  | 0.954  |

CHF-PRO, chronic heart failure - patient reported outcome; COPD, chronic obstructive pulmonary disease; NYHA, New York Heart Association functional class.



**Table S7 Baseline Characteristics of Patients With or Without MACEs**

|                                           | <b>Without-MACEs<br/>(n=615)</b> | <b>MACEs (n=326)</b> | <b>P</b> |
|-------------------------------------------|----------------------------------|----------------------|----------|
| <b>Age</b>                                | 67.19 (56.38, 77.56)             | 71.42 (62.32, 78.96) | 0.002    |
| <b>Female</b>                             | 242 (39.35%)                     | 157 (48.16%)         | 0.009    |
| <b>NYHA</b>                               |                                  |                      | 0.354    |
| II                                        | 128 (20.81%)                     | 58 (17.79%)          |          |
| III                                       | 255 (41.46%)                     | 131 (40.18%)         |          |
| IV                                        | 232 (37.72%)                     | 137 (42.02%)         |          |
| <b>Heart rate (beats per minute)</b>      | 77 (67, 90)                      | 75 (67, 88)          | 0.552    |
| <b>Systolic blood pressure (mmHg)</b>     | 125 (112, 139)                   | 122 (110, 136)       | 0.173    |
| <b>Diastolic blood pressure (mmHg)</b>    | 76 (68, 84)                      | 75 (66, 83)          | 0.28     |
| <b>Body Mass Index (kg/m<sup>2</sup>)</b> | 23.5 (20.98, 26.84)              | 23.44 (21.09, 26.12) | 0.466    |
| <b>Marital status</b>                     |                                  |                      | 0.649    |
| Married                                   | 10 (1.63%)                       | 7 (2.15%)            |          |
| Single                                    | 511 (83.09%)                     | 260 (79.75%)         |          |
| Divorced                                  | 8 (1.30%)                        | 5 (1.53%)            |          |
| Widowed                                   | 86 (13.98%)                      | 54 (16.56%)          |          |
| <b>Education</b>                          |                                  |                      | 0.588    |
| Illiteracy                                | 51 (8.29%)                       | 30 (9.20%)           |          |
| Low level                                 | 374 (60.81%)                     | 187 (57.36%)         |          |
| Secondary school and high level           | 190 (30.89%)                     | 109 (33.44%)         |          |

---

|                             |              |              |        |
|-----------------------------|--------------|--------------|--------|
| <b>Occupation</b>           |              |              | 0.939  |
| Manual workers              | 409 (66.50%) | 216 (66.26%) |        |
| Nonmanual workers           | 206 (33.50%) | 110 (33.74%) |        |
| <b>Income</b>               |              |              | 0.440  |
| Low                         | 350 (56.91%) | 175 (53.68%) |        |
| Medium                      | 257 (41.79%) | 144 (44.17%) |        |
| High                        | 8 (1.30%)    | 7 (2.15%)    |        |
| <b>Health care</b>          |              |              | 0.316  |
| City health insurance       | 382 (62.11%) | 218 (66.87%) |        |
| Rural health insurance      | 211 (34.31%) | 96 (29.45%)  |        |
| Self-paying                 | 22 (3.58%)   | 12 (3.68%)   |        |
| <b>Family history</b>       | 163 (26.50%) | 78 (23.93%)  | 0.389  |
| <b>Smoking history</b>      |              |              | 0.018  |
| Never                       | 357 (58.05%) | 220 (67.48%) |        |
| Quitting smoking            | 173 (28.13%) | 72 (22.09%)  |        |
| Smoking                     | 85 (13.82%)  | 34 (10.43%)  |        |
| <b>Drinking</b>             | 44 (7.15%)   | 18 (5.52%)   | <0.001 |
| <b>Complications</b>        |              |              |        |
| Coronary heart disease      | 316 (51.38%) | 171 (52.45%) | 0.754  |
| Hypertension                | 343 (55.77%) | 174 (53.37%) | 0.482  |
| Chronic renal insufficiency | 106 (17.24%) | 78 (23.93%)  | 0.014  |
| Diabetes                    | 166 (26.99%) | 96 (29.45%)  | 0.424  |

---

|                        |              |              |        |
|------------------------|--------------|--------------|--------|
| Atrial fibrillation    | 211 (34.31%) | 142 (43.56%) | 0.005  |
| Stroke                 | 103 (16.75%) | 64 (19.63%)  | 0.271  |
| COPD                   | 77 (12.52%)  | 37 (11.35%)  | 0.601  |
| Cancers                | 16 (2.60%)   | 15 (4.60%)   | 0.102  |
| Valvular heart disease | 120 (19.51%) | 78 (23.93%)  | 0.114  |
| <b>CHF-PRO</b>         |              |              |        |
| Physical domain        | 43 (34, 51)  | 38 (31, 45)  | <0.001 |
| Psychological domain   | 71 (58, 78)  | 66 (53, 75)  | <0.001 |
| Social domain          | 17 (13, 21)  | 17 (13, 21)  | 0.704  |
| Therapeutic domain     | 34 (31, 39)  | 34 (31, 39)  | 0.834  |

CHF-PRO, chronic heart failure - patient reported outcome; COPD, chronic obstructive pulmonary disease; NYHA, New York Heart Association functional class; MACEs, major adverse cardiovascular events.

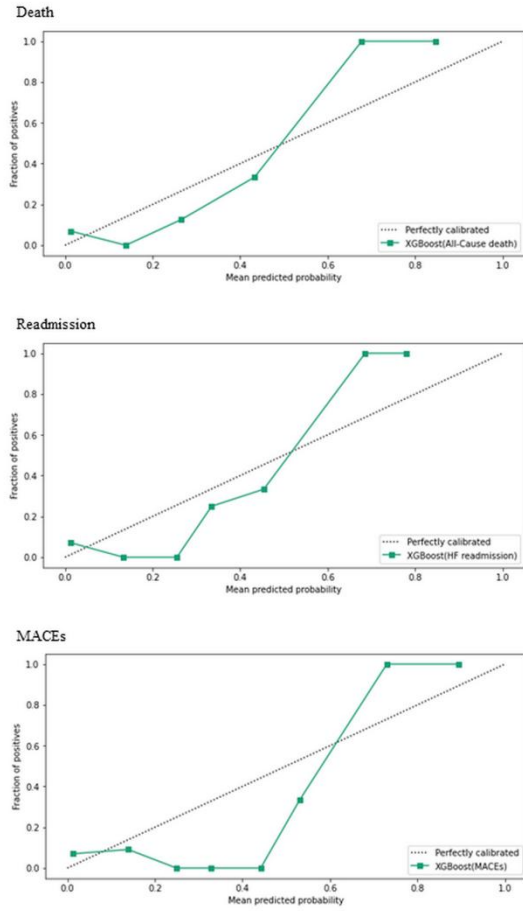

Figure S1. The calibration curves for predicting the outcomes of death (A), readmission (B) and MACEs (C). The x-axis represents the overall predicted probability of the outcomes and the y-axis represents the actual probability. Model calibration is indicated by the degree of fitting of curve and the diagonal.
